# Supplementary material for: Xanthene-based fluorescence turn-on detection of phosgene via analyte-triggered isocyanate formation
Source: Royal Society of Chemistry journal article supplement (doi:10.1039/d4nj02843k), 2024-01-01
Supplement: d4nj02843k1.pdf [file d4nj02843k1.pdf]

## Electronic Supplementary Information

# Xanthene-based fluorescence turn-on detection of phosgene via analyte-triggered isocyanate formation

Bhanu Priya,<sup>a</sup> Naresh Kumar,<sup>\*b</sup> and Roopa<sup>\*a</sup>

<sup>a</sup>Department of Chemistry, I.K. Gujral Punjab Technical University, Kapurthala, Punjab 144603, India.

E-mail: [dr.roopa@ptu.ac.in](mailto:dr.roopa@ptu.ac.in)

<sup>b</sup>Department of Chemistry, SRM University Delhi-NCR, Sonapat-131029, Haryana, India.

E-mail: [naresh.chem.ia@gmail.com](mailto:naresh.chem.ia@gmail.com)

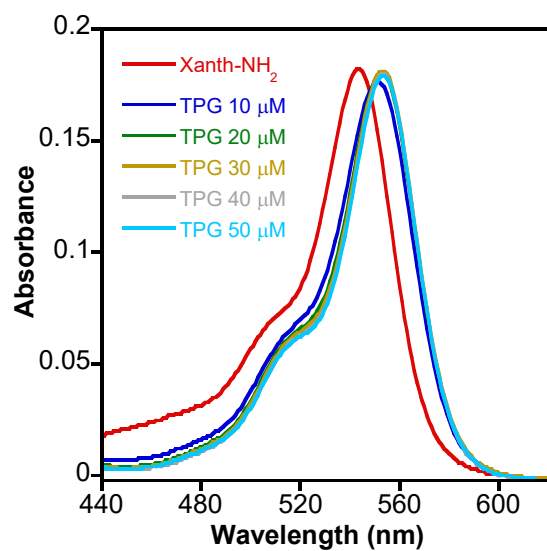

**Figure. S1.** UV-visible response of Xanth-NH<sub>2</sub> (5 μM) with addition of 50 μM of TPG in acetonitrile containing 100 μM of 1% TEA.

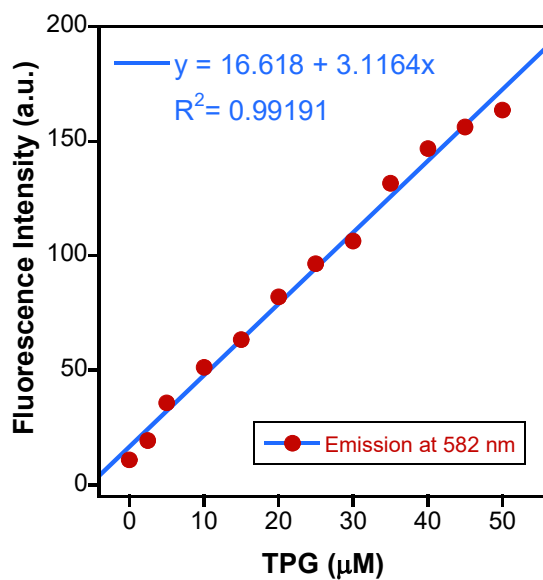

**Figure S2.** Plot of a linear relationship between fluorescence intensity at 582 nm and concentration of TPG.

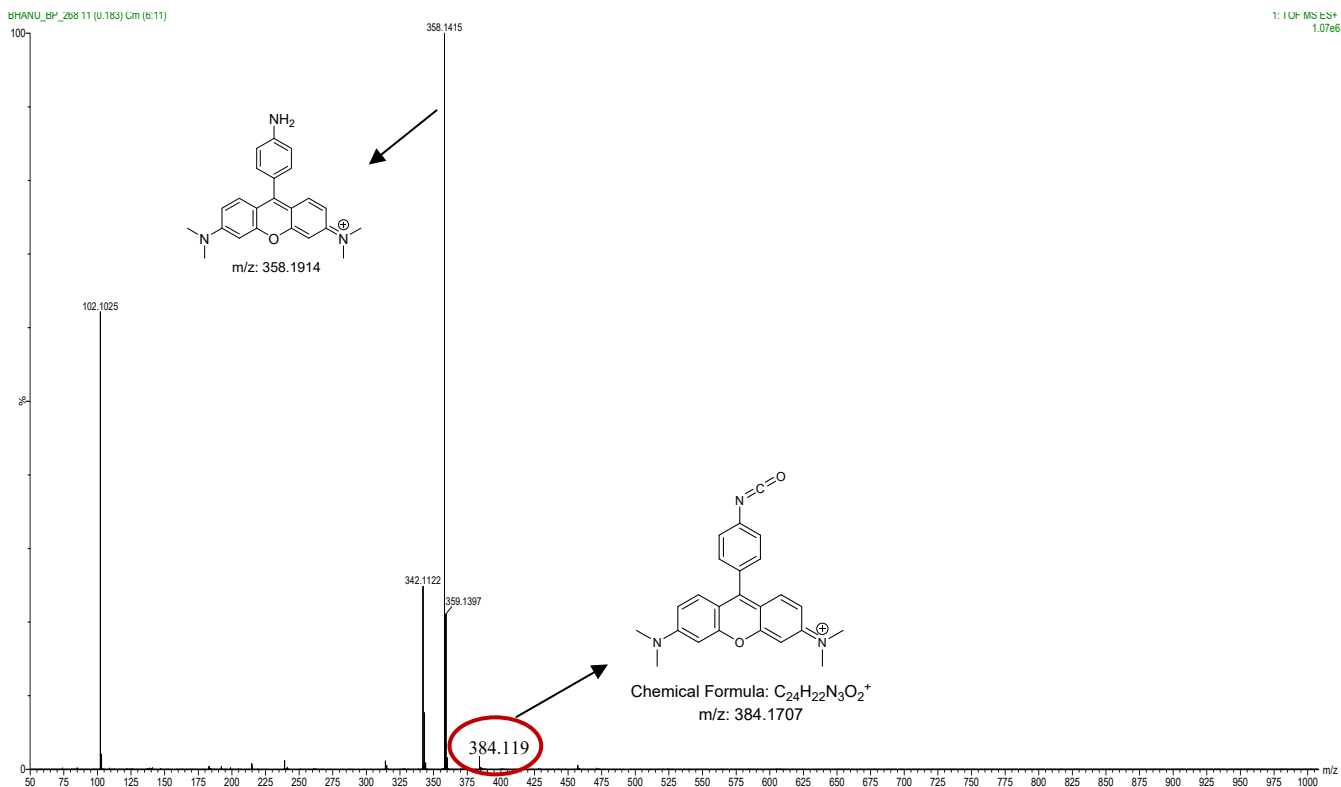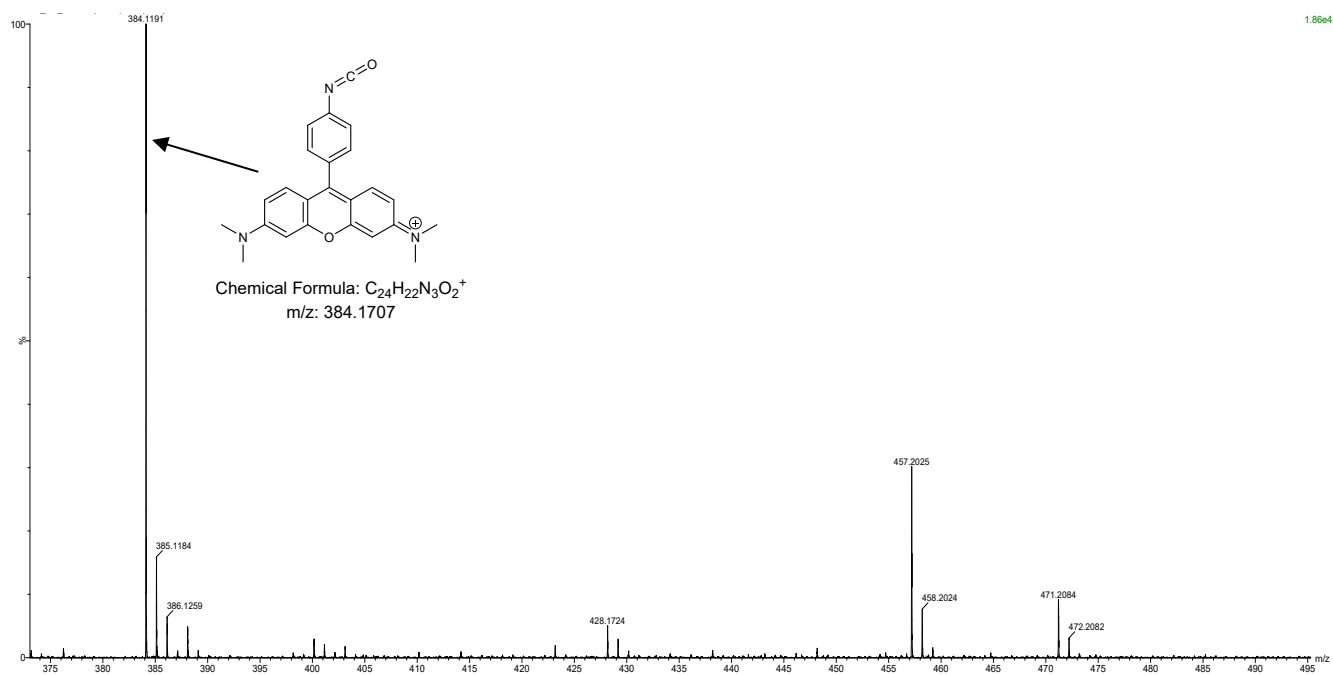

Figure S3. Mass spectrum of Xanth-NH<sub>2</sub> in the presence of phosgene.

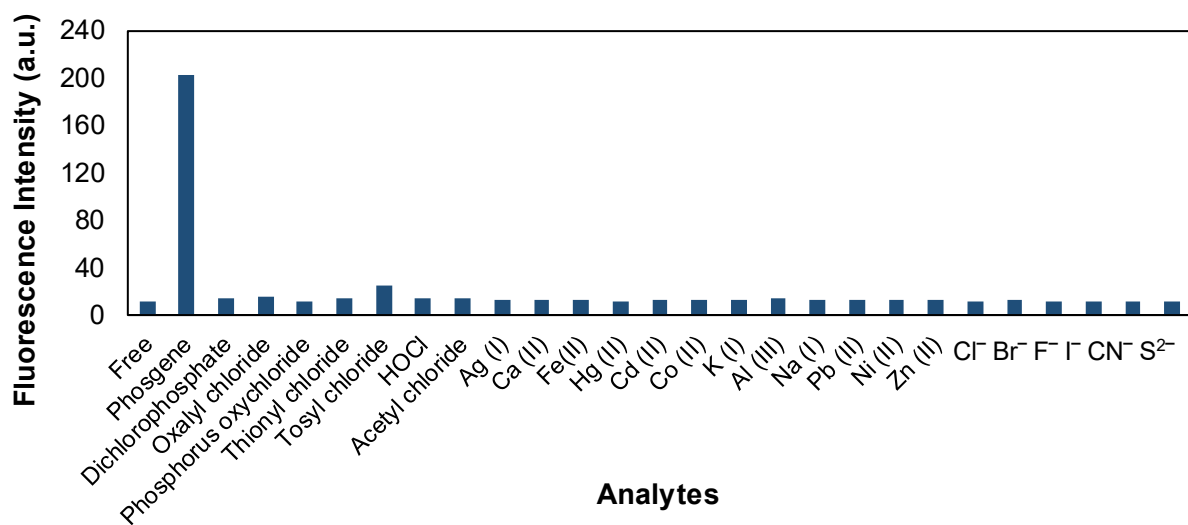

**Figure S4:** Selectivity profile of Xanth-NH<sub>2</sub> (5 μM) upon addition of phosgene (100 μM TPG/100 μM of 1%TEA) and other analytes (250 μM each). Data reported after 2 min of addition. Solvent CH<sub>3</sub>CN, λ<sub>ex/em</sub> = 540 nm/582 nm.

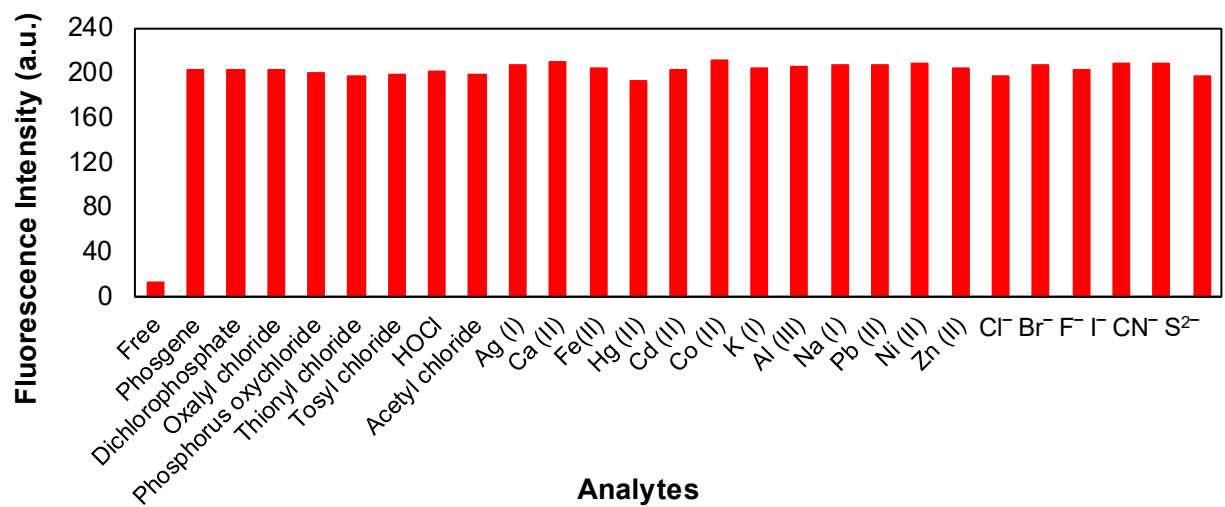

**Figure S5.** Competitive selectivity profile of Xanth-NH<sub>2</sub> (5 μM) for phosgene (100 μM TPG/100 μM of 1%TEA) in the presence of different analytes. Data reported after 2 min of addition. Solvent CH<sub>3</sub>CN, λ<sub>ex/em</sub> = 540 nm/582 nm.

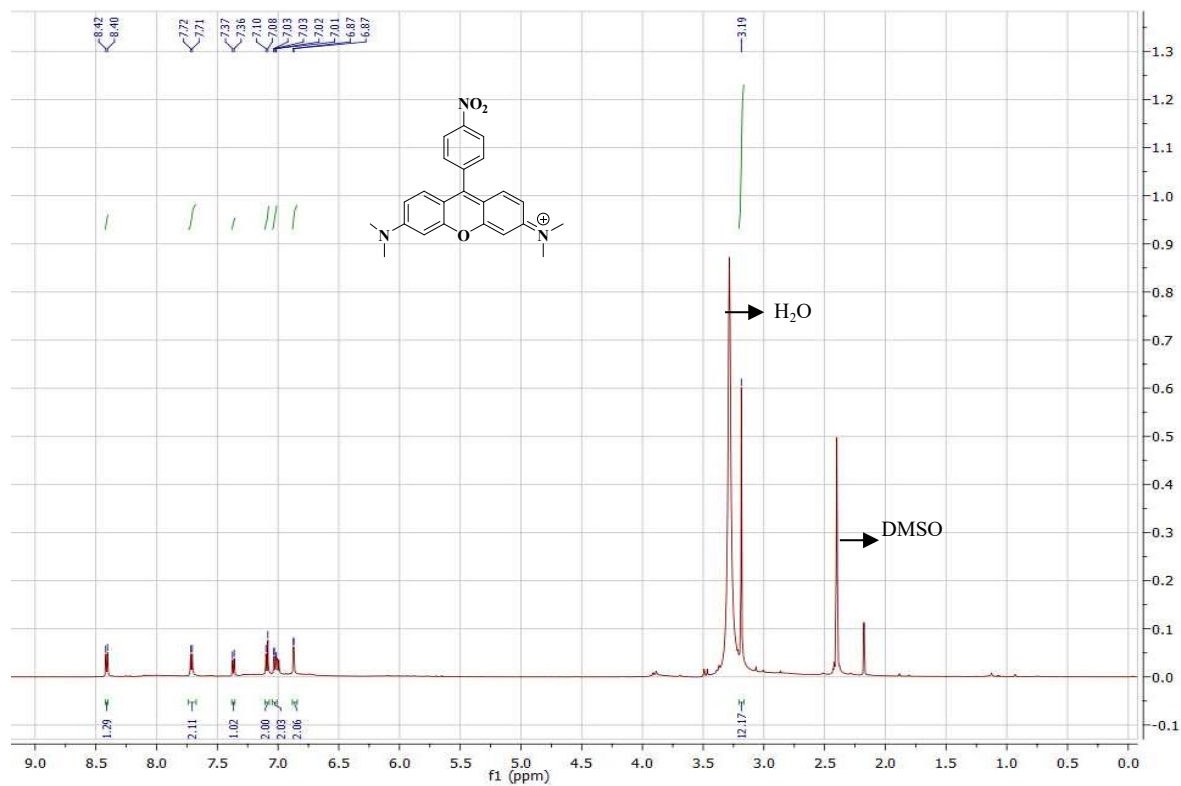

Figure S6: <sup>1</sup>H NMR spectrum of compound Xanth-NO<sub>2</sub> in DMSO-*d*<sub>6</sub>.

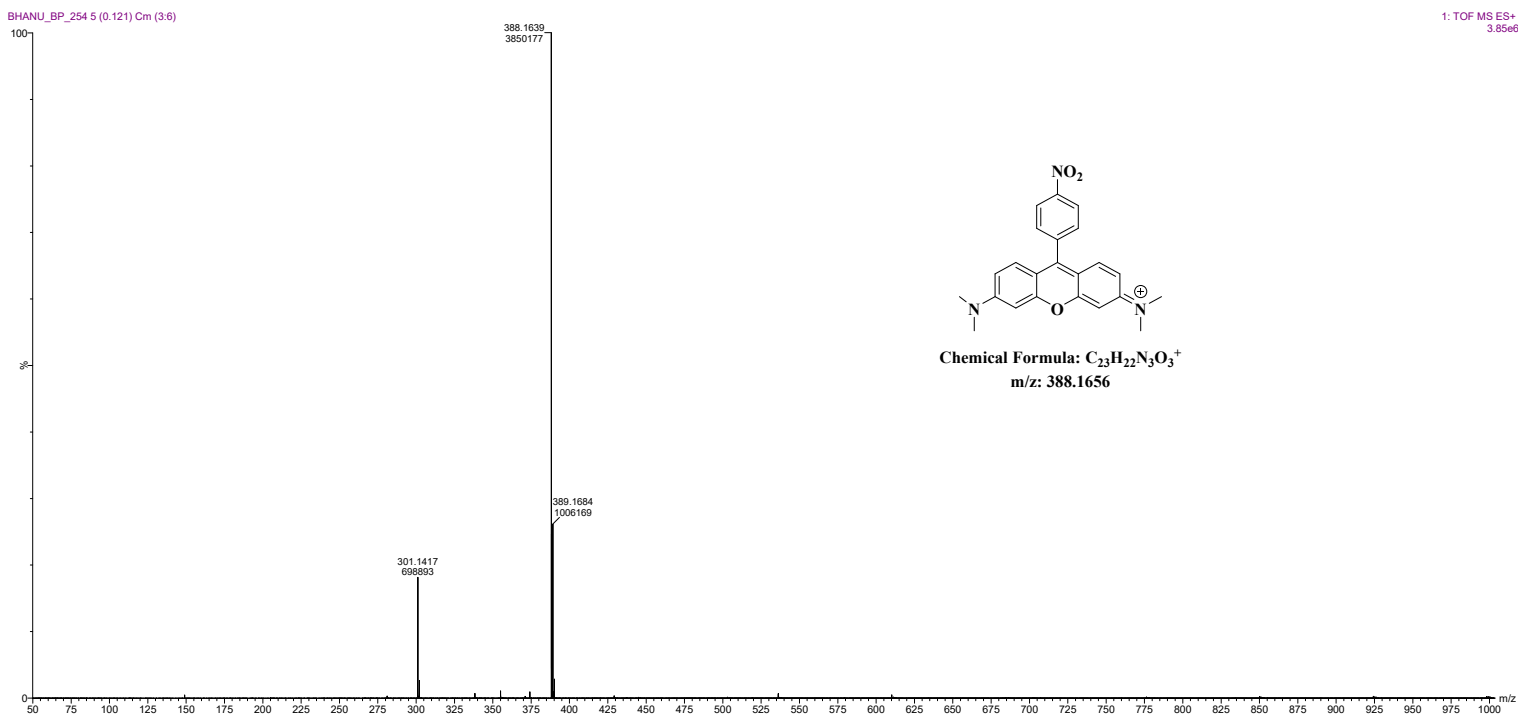

Figure S7: HRMS spectrum of compound Xanth-NO<sub>2</sub>.

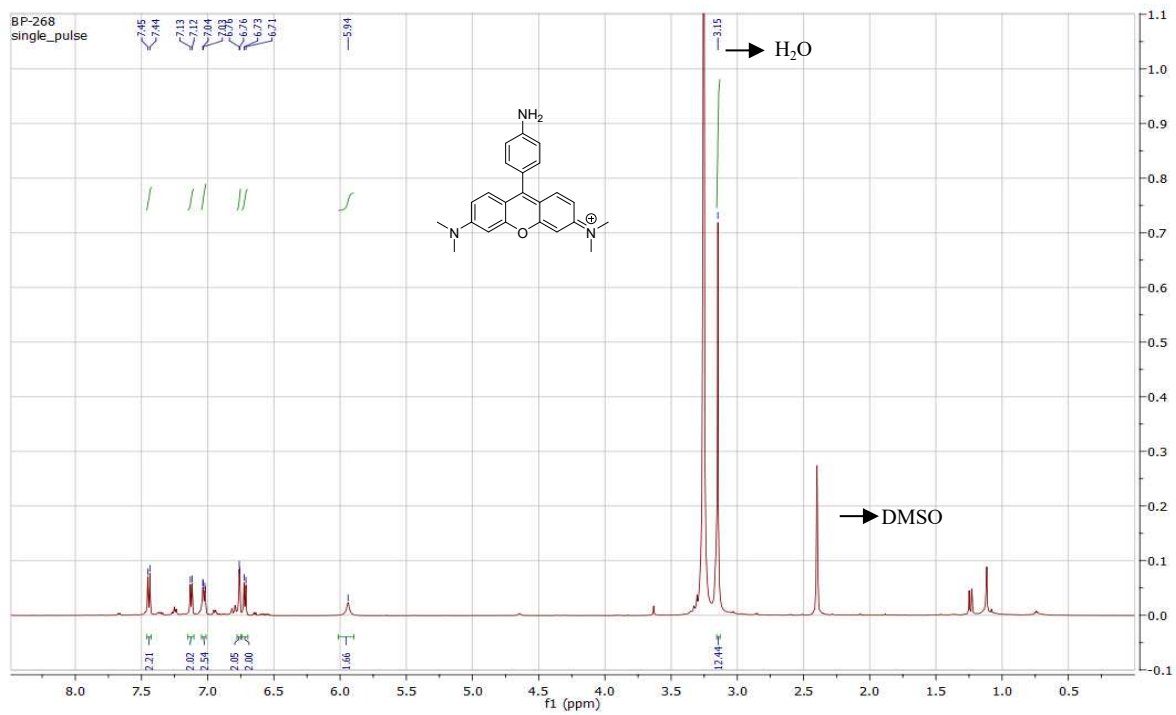

**Figure S8:** <sup>1</sup>H NMR spectrum of compound Xanth-NH<sub>2</sub> in DMSO-*d*<sub>6</sub>.

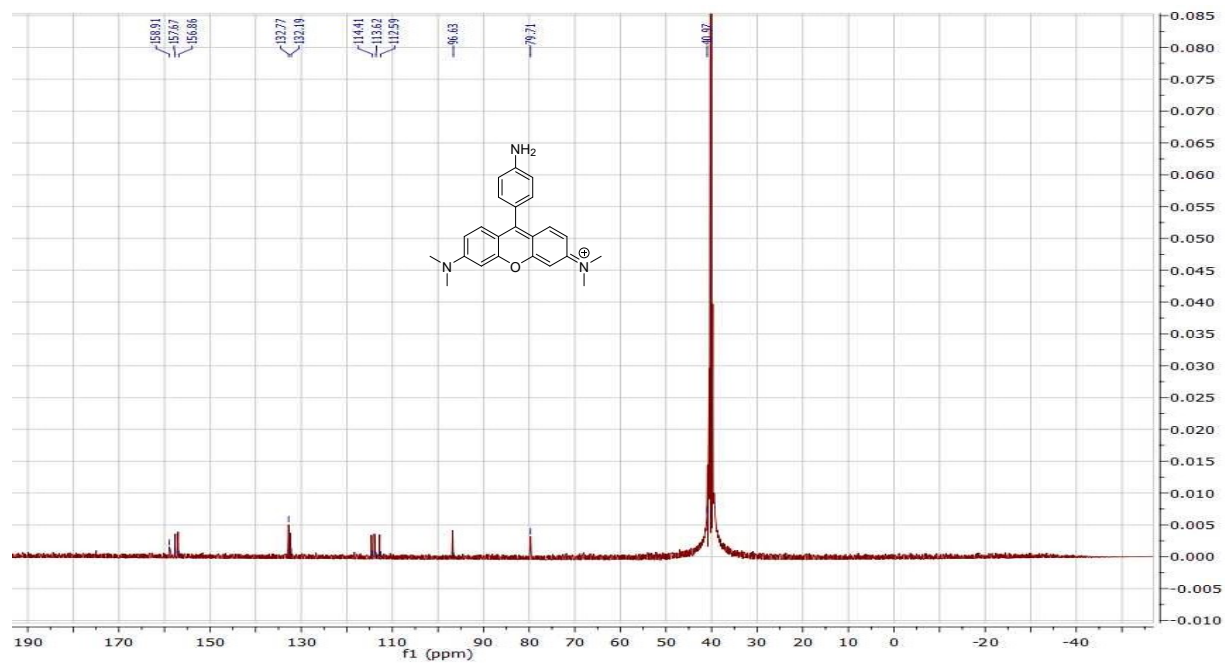

**Figure S9:** <sup>13</sup>C NMR spectrum of compound Xanth-NH<sub>2</sub> in DMSO-*d*<sub>6</sub>.

BHANU\_BP\_256 5 (0.121) Cm (4.8)

IV-33-11  
1: TOF-MS ES+  
3.7066

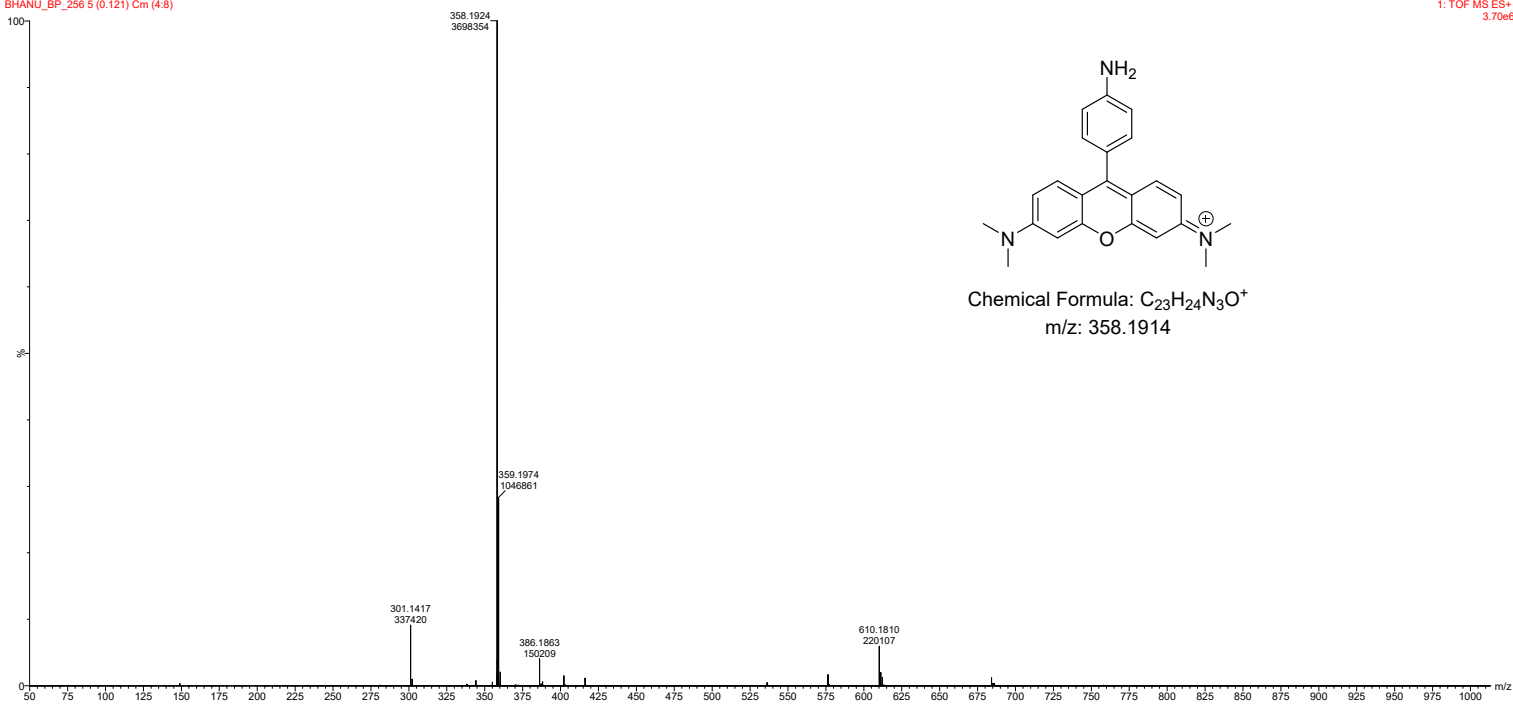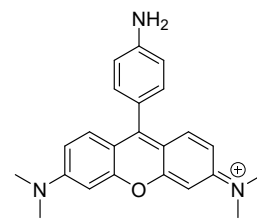

Chemical Formula:  $C_{23}H_{24}N_3O^+$   
m/z: 358.1914

Figure S10: HRMS spectrum of compound Xanth-NH<sub>2</sub>.
